# Supplementary material for: Host mediated inflammatory influence on glioblastoma multiforme recurrence following high-dose ionizing radiation
Source: PubMed Central journal article supplement (PMC5439715; doi:10.1371/journal.pone.0178155), 2017-05-22
Supplement: pone.0178155.s001.pdf [file pone.0178155.s001.pdf]

**S1 Table. Illumina gene expression results.** Microarray results of 281 statistically significant genes differentially regulated between 1, 4, 6 or 35 days after 8Gy or 16Gy (FDR < 10% and fold change > ±1.5).

| Name      | Description                                              | Entrez ID | ANOVA p-value | FDR (Bonferroni-Holm) |
|-----------|----------------------------------------------------------|-----------|---------------|-----------------------|
| IL1RN     | interleukin 1 receptor antagonist                        | 3557      | 2.22E-16      | 6.95E-12              |
| CDC42EP4  | CDC42 effector protein (Rho GTPase binding) 4            | 23580     | 4.44E-16      | 1.39E-11              |
| CXCL5     | chemokine (C-X-C motif) ligand 5                         | 6374      | 6.66E-16      | 2.09E-11              |
| HIST2H2BE | histone cluster 2, H2be                                  | 8349      | 1.11E-15      | 3.48E-11              |
| ATF3      | activating transcription factor 3                        | 467       | 1.50E-14      | 4.69E-10              |
| PSG4      | pregnancy specific beta-1-glycoprotein 4                 | 5672      | 2.02E-14      | 6.33E-10              |
| CCL3L3    | chemokine (C-C motif) ligand 3-like 3                    | 414062    | 2.07E-14      | 6.46E-10              |
| CCL3      | chemokine (C-C motif) ligand 3                           | 6348      | 3.23E-14      | 1.01E-09              |
| CCL3L1    | chemokine (C-C motif) ligand 3-like 1                    | 6349      | 4.60E-14      | 1.44E-09              |
| CCL20     | chemokine (C-C motif) ligand 20                          | 6364      | 5.25E-14      | 1.64E-09              |
| CSF2      | colony stimulating factor 2 (granulocyte-macrophage)     | 1437      | 6.32E-14      | 1.98E-09              |
| MMP12     | matrix metalloproteinase 12 (macrophage elastase)        | 4321      | 8.42E-14      | 2.63E-09              |
| IL24      | interleukin 24                                           | 11009     | 9.03E-14      | 2.82E-09              |
| DCN       | decorin                                                  | 1634      | 1.11E-13      | 3.48E-09              |
| CXCL1     | chemokine (C-X-C motif) ligand 1                         | 2919      | 1.15E-13      | 3.61E-09              |
| DPYSL3    | dihydropyrimidinase-like 3                               | 1809      | 2.35E-13      | 7.37E-09              |
| AURKB     | aurora kinase B                                          | 9212      | 2.41E-13      | 7.55E-09              |
| CHI3L2    | chitinase 3-like 2                                       | 1117      | 2.66E-13      | 8.31E-09              |
| CCNB2     | cyclin B2                                                | 9133      | 4.68E-13      | 1.46E-08              |
| MMP10     | matrix metalloproteinase 10                              | 4319      | 5.37E-13      | 1.68E-08              |
| IL6       | interleukin 6                                            | 3569      | 7.43E-13      | 2.32E-08              |
| IL1F5     | interleukin 1 family, member 5 (delta)                   | 26525     | 1.12E-12      | 3.49E-08              |
| SPRR2D    | small proline-rich protein 2D                            | 6703      | 1.21E-12      | 3.79E-08              |
| CDKN1A    | cyclin-dependent kinase inhibitor 1A (p21, Cip1)         | 1026      | 1.60E-12      | 4.99E-08              |
| CCL5      | chemokine (C-C motif) ligand 5                           | 6352      | 1.61E-12      | 5.04E-08              |
| LOC387763 | hypothetical                                             | 387763    | 1.64E-12      | 5.13E-08              |
| PI3       | peptidase inhibitor 3                                    | 5266      | 2.00E-12      | 6.23E-08              |
| PTGS2     | prostaglandin-endoperoxide synthase 2                    | 5743      | 2.11E-12      | 6.60E-08              |
| SLC25A24  | solute carrier family 25 (mitochondrial carrier)         | 29957     | 2.13E-12      | 6.65E-08              |
| DEFB103B  | defensin, beta 103B                                      | 414325    | 2.17E-12      | 6.77E-08              |
| IL1F10    | interleukin 1 family, member 10 (theta)                  | 84639     | 2.30E-12      | 7.18E-08              |
| KIFC1     | kinesin family member C1                                 | 3833      | 2.96E-12      | 9.23E-08              |
| KIF20A    | kinesin family member 20A                                | 10112     | 3.41E-12      | 1.07E-07              |
| FOSL1     | FOS-like antigen 1                                       | 8061      | 4.50E-12      | 1.40E-07              |
| PITPNC1   | phosphatidylinositol transfer protein, cytoplasmic 1     | 26207     | 6.09E-12      | 1.90E-07              |
| FLJ16165  | purple acid phosphatase long form                        | 390928    | 8.78E-12      | 2.74E-07              |
| CXCL2     | chemokine (C-X-C motif) ligand 2                         | 2920      | 1.06E-11      | 3.32E-07              |
| MAFB      | v-maf musculoaponeurotic fibrosarcoma oncogene homolog B | 9935      | 1.18E-11      | 3.69E-07              |
| IL1A      | interleukin 1, alpha                                     | 3552      | 1.22E-11      | 3.79E-07              |
| SERTAD1   | SERTA domain containing 1                                | 29950     | 1.74E-11      | 5.42E-07              |
| LIF       | leukemia inhibitory factor                               | 3976      | 2.05E-11      | 6.37E-07              |
| LRRC15    | leucine rich repeat containing 15                        | 131578    | 2.17E-11      | 6.77E-07              |
| HIST1H2BD | histone cluster 1, H2bd                                  | 3017      | 2.22E-11      | 6.90E-07              |
| FCRLA     | Fc receptor-like A                                       | 84824     | 2.42E-11      | 7.52E-07              |
| CDCA8     | cell division cycle associated 8                         | 55143     | 2.60E-11      | 8.11E-07              |
| C20ORF100 | chromosome 20 open reading frame 100                     | 84969     | 2.68E-11      | 8.34E-07              |
| IL1F8     | interleukin 1 family, member 8 (eta)                     | 27177     | 2.68E-11      | 8.34E-07              |
| ALDH7A1   | aldehyde dehydrogenase 7 family, member A1               | 501       | 3.39E-11      | 1.05E-06              |
| SCG2      | secretogranin II (chromogranin C)                        | 7857      | 3.62E-11      | 1.13E-06              |

|              |                                                            |           |          |          |
|--------------|------------------------------------------------------------|-----------|----------|----------|
| ERN1         | endoplasmic reticulum to nucleusing 1                      | 2081      | 3.77E-11 | 1.17E-06 |
| ADORA2A      | adenosine A2a receptor                                     | 135       | 3.81E-11 | 1.18E-06 |
| HIST2H2AA3   | histone cluster 2, H2aa3                                   | 8337      | 4.50E-11 | 1.40E-06 |
| TOX2         | TOX high mobility group box family member 2                | 84969     | 5.25E-11 | 1.63E-06 |
| DUSP1        | dual specificity phosphatase 1                             | 1843      | 9.04E-11 | 2.81E-06 |
| IL12A        | interleukin 12A (natural killer cell stimulatory factor 1) | 3592      | 9.24E-11 | 2.87E-06 |
| LCP1         | lymphocyte cytosolic protein 1 (L-plastin)                 | 3936      | 9.33E-11 | 2.90E-06 |
| LOC100133511 | PREDICTED: similar to complement component C3              | 100133511 | 1.02E-10 | 3.17E-06 |
| SERPINB4     | serpin peptidase inhibitor, clade B member 4               | 6318      | 1.07E-10 | 3.34E-06 |
| NCAPD2       | non-SMC condensin I complex, subunit D2                    | 9918      | 1.12E-10 | 3.47E-06 |
| SPINK1       | serine peptidase inhibitor, Kazal type 1                   | 6690      | 1.23E-10 | 3.82E-06 |
| SOD2         | superoxide dismutase 2, mitochondrial                      | 6648      | 1.28E-10 | 3.96E-06 |
| PCLO         | piccolo (presynaptic cytomatrix protein)                   | 27445     | 1.30E-10 | 4.04E-06 |
| MGC10997     | pseudogene MGC10997 on chromosome 15.                      | 84741     | 1.59E-10 | 4.92E-06 |
| ESM1         | endothelial cell-specific molecule 1                       | 11082     | 1.61E-10 | 5.00E-06 |
| TNFAIP3      | tumor necrosis factor, alpha-induced protein 3             | 7128      | 2.59E-10 | 8.02E-06 |
| CCNA2        | cyclin A2                                                  | 890       | 2.80E-10 | 8.66E-06 |
| LOC346887    | PREDICTED: similar to solute carrier family 16             | 346887    | 2.89E-10 | 8.94E-06 |
| FOSB         | FBJ murine osteosarcoma viral oncogene homolog B           | 2354      | 2.99E-10 | 9.26E-06 |
| HIST2H2AA4   | histone cluster 2, H2aa4                                   | 723790    | 3.00E-10 | 9.28E-06 |
| FST          | follistatin                                                | 10468     | 3.07E-10 | 9.52E-06 |
| SLC2A6       | solute carrier family 2 member 6                           | 11182     | 3.32E-10 | 1.03E-05 |
| NAV1         | neuron navigator 1                                         | 89796     | 3.40E-10 | 1.05E-05 |
| CYP26B1      | cytochrome P450, family 26, subfamily B                    | 56603     | 3.49E-10 | 1.08E-05 |
| LOC653879    | PREDICTED: similar to Complement C3 precursor              | 653879    | 3.57E-10 | 1.11E-05 |
| DUSP10       | dual specificity phosphatase 10                            | 11221     | 3.73E-10 | 1.15E-05 |
| IL1F9        | interleukin 1 family, member 9                             | 56300     | 4.03E-10 | 1.25E-05 |
| HIST1H4H     | histone cluster 1, H4h                                     | 8365      | 4.11E-10 | 1.27E-05 |
| ABI3BP       | ABI gene family, member 3 binding protein                  | 25890     | 4.38E-10 | 1.35E-05 |
| BAMBI        | BMP and activin membrane-bound inhibitor homolog           | 25805     | 4.78E-10 | 1.48E-05 |
| SAT1         | spermidine/spermine N1-acetyltransferase 1                 | 6303      | 4.80E-10 | 1.49E-05 |
| CLCF1        | cardiotrophin-like cytokine factor 1                       | 23529     | 4.84E-10 | 1.50E-05 |
| HIST1H2BG    | histone cluster 1, H2bg (HIST1H2BG)                        | 8339      | 5.10E-10 | 1.58E-05 |
| DIO2         | deiodinase, iodothyronine, type II                         | 1734      | 5.24E-10 | 1.62E-05 |
| MAFF         | v-maf musculoaponeurotic fibrosarcoma oncogene homolog F   | 23764     | 5.60E-10 | 1.73E-05 |
| EEF1D        | eukaryotic translation elongation factor 1 delta           | 1936      | 5.89E-10 | 1.82E-05 |
| TXNIP        | thioredoxin interacting protein                            | 10628     | 6.38E-10 | 1.97E-05 |
| CTPS2        | CTP synthase II                                            | 56474     | 6.54E-10 | 2.02E-05 |
| SLC16A6      | solute carrier family 16, member 6                         | 9120      | 6.83E-10 | 2.11E-05 |
| IMPDH2       | IMP (inosine monophosphate) dehydrogenase 2                | 3615      | 7.44E-10 | 2.30E-05 |
| CXXC5        | CXXC finger 5                                              | 51523     | 9.09E-10 | 2.80E-05 |
| CPS1         | carbamoyl-phosphate synthetase 1, mitochondrial            | 1373      | 9.10E-10 | 2.81E-05 |
| LUM          | lumican                                                    | 4060      | 9.71E-10 | 2.99E-05 |
| C5ORF13      | chromosome 5 open reading frame 13                         | 9315      | 1.02E-09 | 3.16E-05 |
| LOC731314    | PREDICTED: similar to H2A histone family, member X         | 731314    | 1.04E-09 | 3.21E-05 |
| SMTN         | smoothelin                                                 | 6525      | 1.15E-09 | 3.56E-05 |
| CSF3         | colony stimulating factor 3 (granulocyte)                  | 1440      | 1.35E-09 | 4.17E-05 |
| GADD45B      | growth arrest and DNA-damage-inducible, beta               | 4616      | 1.43E-09 | 4.39E-05 |
| NFKBIZ       | nuclear factor kappa light B-cell enhancer inhibitor, zeta | 64332     | 1.51E-09 | 4.65E-05 |
| NRG1         | neuregulin 1                                               | 3084      | 1.53E-09 | 4.70E-05 |
| ANKRD1       | ankyrin repeat domain 1                                    | 27063     | 1.68E-09 | 5.17E-05 |
| HIST1H4C     | histone cluster 1, H4c                                     | 8364      | 2.54E-09 | 7.80E-05 |
| CYP4B1       | cytochrome P450, family 4, subfamily B, polypeptide 1      | 1580      | 2.62E-09 | 8.03E-05 |
| LOXL4        | lysyl oxidase-like 4                                       | 84171     | 3.28E-09 | 1.01E-04 |
| HIST1H2AC    | histone cluster 1, H2ac                                    | 8334      | 3.37E-09 | 1.03E-04 |
| LOC654433    | hypothetical LOC654433                                     | 654433    | 3.41E-09 | 1.04E-04 |
| C3           | complement component 3                                     | 718       | 3.60E-09 | 1.10E-04 |
| DTNA         | dystrobrevin, alpha                                        | 1837      | 3.67E-09 | 1.13E-04 |
| HJURP        | Holliday junction recognition protein                      | 55355     | 3.77E-09 | 1.15E-04 |

|              |                                                                            |           |          |          |
|--------------|----------------------------------------------------------------------------|-----------|----------|----------|
| IER3         | immediate early response 3                                                 | 8870      | 3.90E-09 | 1.19E-04 |
| HSD11B1      | hydroxysteroid (11-beta) dehydrogenase 1                                   | 3290      | 4.03E-09 | 1.23E-04 |
| DUSP5        | dual specificity phosphatase 5                                             | 1847      | 4.09E-09 | 1.25E-04 |
| HAS1         | hyaluronan synthase 1                                                      | 3036      | 4.54E-09 | 1.39E-04 |
| DDIT3        | DNA-damage-inducible transcript 3                                          | 1649      | 4.88E-09 | 1.49E-04 |
| MARCH4       | membrane-associated ring finger (C3HC4)                                    | 57574     | 4.92E-09 | 1.50E-04 |
| HMGCS1       | 3-hydroxy-3-methylglutaryl-Coenzyme A synthase 1                           | 3157      | 5.70E-09 | 1.74E-04 |
| SARS2        | seryl-tRNA synthetase 2, mitochondrial                                     | 54938     | 6.05E-09 | 1.85E-04 |
| DDIT4L       | DNA-damage-inducible transcript 4-like                                     | 115265    | 6.29E-09 | 1.92E-04 |
| IL8          | interleukin 8                                                              | 3576      | 6.33E-09 | 1.93E-04 |
| DKK1         | dickkopf homolog 1                                                         | 22943     | 6.70E-09 | 2.05E-04 |
| RND3         | Rho family GTPase 3                                                        | 390       | 6.90E-09 | 2.11E-04 |
| ANKRD13A     | ankyrin repeat domain 13A                                                  | 88455     | 7.16E-09 | 2.18E-04 |
| RCAN1        | regulator of calcineurin 1                                                 | 1827      | 7.44E-09 | 2.27E-04 |
| FHOD1        | formin homology 2 domain containing 1                                      | 29109     | 7.62E-09 | 2.32E-04 |
| SERPINB2     | serpin peptidase inhibitor, clade B                                        | 5055      | 7.86E-09 | 2.40E-04 |
| ALDH3B1      | aldehyde dehydrogenase 3 family, member B1                                 | 221       | 7.95E-09 | 2.42E-04 |
| TNFRSF10B    | tumor necrosis factor receptor superfamily, member 10b                     | 8795      | 8.15E-09 | 2.49E-04 |
| ITGAX        | integrin, alpha X (complement component 3 receptor 4)                      | 3687      | 8.36E-09 | 2.55E-04 |
| MIR302C      | microRNA 302c                                                              | 442895    | 9.04E-09 | 2.75E-04 |
| AKR1C4       | aldo-keto reductase family 1, member C4                                    | 1109      | 9.22E-09 | 2.81E-04 |
| IL33         | interleukin 33                                                             | 90865     | 9.29E-09 | 2.83E-04 |
| TUBGCP2      | tubulin, gamma complex associated protein 2                                | 10844     | 9.31E-09 | 2.84E-04 |
| ZNF503       | zinc finger protein 503                                                    | 84858     | 9.53E-09 | 2.90E-04 |
| FLJ22639     | PREDICTED: hypothetical protein                                            | 79854     | 9.66E-09 | 2.94E-04 |
| PTGES        | prostaglandin E synthase                                                   | 9536      | 9.89E-09 | 3.01E-04 |
| SLC39A14     | solute carrier family 39                                                   | 23516     | 1.04E-08 | 3.18E-04 |
| DAB2         | disabled homolog 2, mitogen-responsive phosphoprotein                      | 1601      | 1.06E-08 | 3.24E-04 |
| MIR1974      | microRNA 1974                                                              | 100302207 | 1.20E-08 | 3.66E-04 |
| RASD1        | RAS, dexamethasone-induced 1                                               | 51655     | 1.29E-08 | 3.92E-04 |
| HBEGF        | heparin-binding EGF-like growth factor                                     | 1839      | 1.46E-08 | 4.45E-04 |
| LOC100129104 | PREDICTED: similar hydroxyproline-rich glycoprotein VSP-3                  | 100129104 | 1.53E-08 | 4.65E-04 |
| TNFRSF14     | tumor necrosis factor receptor superfamily, member 14                      | 8764      | 1.55E-08 | 4.71E-04 |
| AHNAK2       | AHNAK nucleoprotein 2                                                      | 113146    | 1.63E-08 | 4.95E-04 |
| MIR1275      | microRNA 1275                                                              | 100302123 | 1.75E-08 | 5.31E-04 |
| ZNF385D      | zinc finger protein 385D                                                   | 79750     | 1.79E-08 | 5.42E-04 |
| ZNF175       | zinc finger protein 175                                                    | 7728      | 1.89E-08 | 5.74E-04 |
| XPOT         | exportin, tRNA                                                             | 11260     | 2.06E-08 | 6.23E-04 |
| HSPA6        | heat shock 70kDa protein 6                                                 | 3310      | 2.38E-08 | 7.19E-04 |
| IL11         | interleukin 11                                                             | 3589      | 2.41E-08 | 7.28E-04 |
| CRYM         | crystallin, mu                                                             | 1428      | 2.50E-08 | 7.56E-04 |
| NRGN         | neurogranin (protein kinase C substrate, RC3)                              | 4900      | 2.52E-08 | 7.61E-04 |
| CARD10       | caspase recruitment domain family, member 10                               | 29775     | 2.76E-08 | 8.35E-04 |
| TSPYL2       | PREDICTED: TSPY-like 2, transcript variant 3 (TSPYL2)                      | 64061     | 2.79E-08 | 8.42E-04 |
| SGK1         | serum/glucocorticoid regulated kinase 1                                    | 6446      | 2.89E-08 | 8.74E-04 |
| RIMS3        | regulating synaptic membrane exocytosis 3                                  | 9783      | 3.09E-08 | 9.33E-04 |
| PARM1        | prostate androgen-regulated mucin-like protein 1                           | 25849     | 3.34E-08 | 1.01E-03 |
| FOLR3        | folate receptor 3 (gamma)                                                  | 2352      | 3.45E-08 | 1.04E-03 |
| KIAA0367     | KIAA0367                                                                   | 23273     | 3.89E-08 | 1.17E-03 |
| GADD45A      | growth arrest and DNA-damage-inducible, alpha                              | 1647      | 3.99E-08 | 1.20E-03 |
| TNFAIP6      | tumor necrosis factor, alpha-induced protein 6                             | 7130      | 4.12E-08 | 1.24E-03 |
| ENO2         | enolase 2 (gamma, neuronal)                                                | 2026      | 4.47E-08 | 1.34E-03 |
| ST3GAL1      | ST3 beta-galactoside alpha-2,3-sialyltransferase 1                         | 6482      | 4.59E-08 | 1.38E-03 |
| ARHGDI3      | Rho GDP dissociation inhibitor (GDI) beta                                  | 397       | 4.60E-08 | 1.38E-03 |
| SVEP1        | sushi, von Willebrand factor type A, EGF and pentraxin domain containing 1 | 79987     | 4.64E-08 | 1.39E-03 |
| ADM          | adrenomedullin                                                             | 133       | 4.90E-08 | 1.47E-03 |
| DDR2         | discoidin domain receptor tyrosine kinase 2                                | 4921      | 4.96E-08 | 1.49E-03 |
| LOC100132805 | PREDICTED: similar to predicted protein                                    | 100132805 | 5.04E-08 | 1.51E-03 |

|              |                                                          |           |          |          |
|--------------|----------------------------------------------------------|-----------|----------|----------|
| ANGPTL4      | angiopoietin-like 4                                      | 51129     | 5.10E-08 | 1.53E-03 |
| PLD6         | phospholipase D family, member 6                         | 201164    | 5.15E-08 | 1.55E-03 |
| ACTA2        | actin, alpha 2, smooth muscle, aorta                     | 59        | 5.16E-08 | 1.55E-03 |
| CCL2         | chemokine (C-C motif) ligand 2                           | 6347      | 5.31E-08 | 1.59E-03 |
| SERPINB8     | serpin peptidase inhibitor, clade B, member 8            | 5271      | 5.72E-08 | 1.72E-03 |
| BMP2         | bone morphogenetic protein 2                             | 650       | 6.32E-08 | 1.90E-03 |
| MMP7         | matrix metalloproteinase 7 (matrilysin, uterine)         | 4316      | 6.44E-08 | 1.93E-03 |
| SRGN         | serglycin                                                | 5552      | 6.72E-08 | 2.01E-03 |
| HAS3         | hyaluronan synthase 3                                    | 3038      | 6.75E-08 | 2.02E-03 |
| ITPRIP       | inositol 1,4,5-triphosphate receptor interacting protein | 85450     | 6.89E-08 | 2.07E-03 |
| RFTN2        | raftlin family member 2                                  | 130132    | 7.35E-08 | 2.20E-03 |
| JMJD6        | jumonji domain containing 6                              | 23210     | 7.52E-08 | 2.25E-03 |
| LOC642567    | PREDICTED: misc_RNA                                      | 642567    | 7.53E-08 | 2.25E-03 |
| ADAMTS1      | ADAM metalloproteinase with thrombospondin type 1 motif  | 9510      | 8.05E-08 | 2.41E-03 |
| ACACA        | acetyl-Coenzyme A carboxylase alpha                      | 31        | 8.09E-08 | 2.42E-03 |
| SNORD16      | small nucleolar RNA, C/D box 16                          | 595097    | 8.37E-08 | 2.50E-03 |
| MAP3K8       | mitogen-activated protein kinase kinase kinase 8         | 1326      | 8.76E-08 | 2.62E-03 |
| RRAD         | Ras-related associated with diabetes                     | 6236      | 9.42E-08 | 2.81E-03 |
| PCOLCE       | procollagen C-endopeptidase enhancer                     | 5118      | 9.60E-08 | 2.87E-03 |
| LRRN3        | leucine rich repeat neuronal 3                           | 54674     | 9.94E-08 | 2.97E-03 |
| PLAUR        | plasminogen activator, urokinase receptor                | 5329      | 1.01E-07 | 3.02E-03 |
| SGK          | serum/glucocorticoid regulated kinase                    | 6446      | 1.02E-07 | 3.05E-03 |
| DEDD2        | death effector domain containing 2                       | 162989    | 1.04E-07 | 3.10E-03 |
| C4ORF7       | chromosome 4 open reading frame 7                        | 260436    | 1.11E-07 | 3.30E-03 |
| C1QTNF1      | C1q and tumor necrosis factor related protein 1          | 114897    | 1.14E-07 | 3.41E-03 |
| NQO1         | NAD(P)H dehydrogenase, quinone 1                         | 1728      | 1.17E-07 | 3.48E-03 |
| TIMP1        | TIMP metalloproteinase inhibitor 1                       | 7076      | 1.22E-07 | 3.63E-03 |
| H1F0         | H1 histone family, member 0                              | 3005      | 1.28E-07 | 3.80E-03 |
| LOC650832    | PREDICTED: similar to MAPK kinase 3 isoform A            | 650832    | 1.34E-07 | 3.98E-03 |
| TMEM132A     | transmembrane protein 132A                               | 54972     | 1.38E-07 | 4.12E-03 |
| RNU6-15      | RNA, U6 small nuclear 15                                 | 100302741 | 1.41E-07 | 4.20E-03 |
| UBE2T        | ubiquitin-conjugating enzyme E2T                         | 29089     | 1.57E-07 | 4.66E-03 |
| ETS2         | v-ets erythroblastosis virus E26 oncogene homolog 2      | 2114      | 1.61E-07 | 4.79E-03 |
| LOC338758    | PREDICTED: hypothetical protein LOC338758                | 338758    | 1.68E-07 | 4.99E-03 |
| PPAP2B       | phosphatidic acid phosphatase type 2B                    | 8613      | 1.70E-07 | 5.05E-03 |
| CLDN14       | claudin 14                                               | 23562     | 1.78E-07 | 5.28E-03 |
| C21ORF7      | chromosome 21 open reading frame 7                       | 56911     | 1.82E-07 | 5.38E-03 |
| TRAF3IP2     | TRAF3 interacting protein 2                              | 10758     | 1.88E-07 | 5.57E-03 |
| GDF15        | growth differentiation factor 15                         | 9518      | 1.92E-07 | 5.68E-03 |
| HIST2H2AC    | histone cluster 2, H2ac                                  | 8338      | 2.05E-07 | 6.08E-03 |
| SLIT2        | slit homolog 2                                           | 9353      | 2.13E-07 | 6.30E-03 |
| PPP1R15A     | protein phosphatase 1, regulatory subunit 15A            | 23645     | 2.30E-07 | 6.80E-03 |
| SRPX2        | sushi-repeat-containing protein, X-linked 2              | 27286     | 2.31E-07 | 6.84E-03 |
| MMP3         | matrix metalloproteinase 3                               | 4314      | 2.45E-07 | 7.23E-03 |
| AXUD1        | AXIN1 up-regulated 1                                     | 64651     | 2.66E-07 | 7.84E-03 |
| IL1B         | interleukin 1, beta                                      | 3553      | 3.01E-07 | 8.87E-03 |
| PRSS23       | protease, serine, 23                                     | 11098     | 3.23E-07 | 9.50E-03 |
| MARCH3       | PREDICTED: membrane-associated ring finger (C3HC4) 3     | 115123    | 3.25E-07 | 9.56E-03 |
| BCL11B       | B-cell CLL/lymphoma 11B (zinc finger protein)            | 64919     | 3.41E-07 | 1.00E-02 |
| POPDC2       | popeye domain containing 2                               | 64091     | 3.47E-07 | 1.02E-02 |
| SPHK1        | sphingosine kinase 1                                     | 8877      | 3.49E-07 | 1.03E-02 |
| STOM         | stomatin                                                 | 2040      | 3.49E-07 | 1.03E-02 |
| LOC645313    | PREDICTED: misc_RNA                                      | 645313    | 3.64E-07 | 1.07E-02 |
| MAP1S        | microtubule-associated protein 1S                        | 55201     | 3.76E-07 | 1.10E-02 |
| BEX1         | brain expressed, X-linked 1                              | 55859     | 3.84E-07 | 1.13E-02 |
| LEPREL1      | leprecan-like 1                                          | 55214     | 4.04E-07 | 1.18E-02 |
| FLNC         | filamin C, gamma                                         | 2318      | 4.15E-07 | 1.22E-02 |
| LOC100133609 | PREDICTED: similar to membrane-associated ring finger 3  | 100133609 | 4.19E-07 | 1.23E-02 |
| FAM65C       | family with sequence similarity 65, member C             | 140876    | 4.20E-07 | 1.23E-02 |

|           |                                                            |        |          |          |
|-----------|------------------------------------------------------------|--------|----------|----------|
| FAT1      | FAT tumor suppressor homolog 1                             | 2195   | 4.59E-07 | 1.34E-02 |
| ACTG2     | actin, gamma 2, smooth muscle, enteric                     | 72     | 4.60E-07 | 1.35E-02 |
| SIK1      | salt-inducible kinase 1                                    | 150094 | 4.70E-07 | 1.38E-02 |
| INSIG1    | insulin induced gene 1                                     | 3638   | 4.71E-07 | 1.38E-02 |
| RAB3B     | RAB3B, member RAS oncogene family                          | 5865   | 4.81E-07 | 1.41E-02 |
| EFEMP1    | EGF-containing fibulin-like extracellular matrix protein 1 | 2202   | 4.97E-07 | 1.45E-02 |
| ODC1      | ornithine decarboxylase 1                                  | 4953   | 5.04E-07 | 1.47E-02 |
| TRIB1     | tribbles homolog 1                                         | 10221  | 5.18E-07 | 1.52E-02 |
| MAP2K3    | mitogen-activated protein kinase kinase 3                  | 5606   | 5.50E-07 | 1.61E-02 |
| HMGB2     | high-mobility group box 2                                  | 3148   | 5.55E-07 | 1.62E-02 |
| QPCT      | glutaminy-peptide cyclotransferase                         | 25797  | 5.69E-07 | 1.66E-02 |
| ARC       | activity-regulated cytoskeleton-associated protein         | 23237  | 5.69E-07 | 1.66E-02 |
| TRAM2     | translocation associated membrane protein 2                | 9697   | 5.90E-07 | 1.72E-02 |
| SCD       | stearoyl-CoA desaturase                                    | 6319   | 6.09E-07 | 1.78E-02 |
| CITED2    | Cbp/p300-interacting transactivator 2                      | 10370  | 6.46E-07 | 1.88E-02 |
| NSMCE4A   | non-SMC element 4 homolog A                                | 54780  | 6.82E-07 | 1.98E-02 |
| HEBP1     | heme binding protein 1                                     | 50865  | 6.87E-07 | 2.00E-02 |
| C8ORF4    | chromosome 8 open reading frame 4                          | 56892  | 7.32E-07 | 2.13E-02 |
| GJB2      | gap junction protein, beta 2, 26kDa                        | 2706   | 7.33E-07 | 2.13E-02 |
| B3GALNT1  | beta-1,3-N-acetylgalactosaminyltransferase 1               | 8706   | 7.44E-07 | 2.16E-02 |
| C9ORF169  | chromosome 9 open reading frame 169                        | 375791 | 7.70E-07 | 2.24E-02 |
| GPR84     | G protein-coupled receptor 84                              | 53831  | 7.83E-07 | 2.27E-02 |
| SNORD3D   | small nucleolar RNA, C/D box 3D                            | 780854 | 8.14E-07 | 2.36E-02 |
| PPARG     | peroxisome proliferator-activated receptor gamma           | 5468   | 9.52E-07 | 2.76E-02 |
| EDN1      | endothelin 1                                               | 1906   | 9.63E-07 | 2.79E-02 |
| RNU6-1    | RNA, U6 small nuclear 1                                    | 26827  | 9.82E-07 | 2.84E-02 |
| ZC3H12A   | zinc finger CCCH-type containing 12A                       | 80149  | 1.03E-06 | 2.96E-02 |
| LOC645166 | PREDICTED: similar to lymphocyte-specific protein 1        | 645166 | 1.03E-06 | 2.97E-02 |
| GPD1L     | glycerol-3-phosphate dehydrogenase 1-like                  | 23171  | 1.04E-06 | 2.99E-02 |
| TOB1      | transducer of ERBB2, 1                                     | 10140  | 1.37E-06 | 3.93E-02 |
| MT1G      | metallothionein 1G                                         | 4495   | 1.53E-06 | 4.40E-02 |
| TOP2A     | topoisomerase (DNA) II alpha 170kDa                        | 7153   | 1.57E-06 | 4.49E-02 |
| NFIL3     | nuclear factor, interleukin 3 regulated                    | 4783   | 1.57E-06 | 4.49E-02 |
| SLC6A15   | solute carrier family 6, member 15                         | 55117  | 1.65E-06 | 4.72E-02 |
| ABCC2     | ATP-binding cassette, sub-family C (CFTR/MRP)              | 1244   | 1.67E-06 | 4.77E-02 |
| GSTA4     | glutathione S-transferase A4                               | 2941   | 1.68E-06 | 4.81E-02 |
| TIPARP    | TCDD-inducible poly(ADP-ribose) polymerase                 | 25976  | 1.69E-06 | 4.83E-02 |
| ZSWIM4    | zinc finger, SWIM-type containing 4                        | 65249  | 1.69E-06 | 4.83E-02 |
| MFAP4     | microfibrillar-associated protein 4                        | 4239   | 1.71E-06 | 4.89E-02 |
| SHMT2     | serine hydroxymethyltransferase 2                          | 6472   | 1.76E-06 | 5.04E-02 |
| NDRG1     | N-myc downstream regulated gene 1                          | 10397  | 1.88E-06 | 5.35E-02 |
| MGC4677   | PREDICTED: hypothetical protein                            | 112597 | 1.88E-06 | 5.35E-02 |
| ACPP      | acid phosphatase, prostate                                 | 55     | 2.04E-06 | 5.81E-02 |
| H2AFJ     | H2A histone family, member J                               | 55766  | 2.06E-06 | 5.87E-02 |
| TGM2      | transglutaminase 2                                         | 7052   | 2.10E-06 | 5.97E-02 |
| PSIP1     | PC4 and SFRS1 interacting protein 1                        | 11168  | 2.12E-06 | 6.02E-02 |
| D2HGDH    | D-2-hydroxyglutarate dehydrogenase                         | 728294 | 2.52E-06 | 7.13E-02 |
| COG5      | component of oligomeric golgi complex 5                    | 10466  | 2.64E-06 | 7.47E-02 |
| S1PR3     | sphingosine-1-phosphate receptor 3                         | 1903   | 2.67E-06 | 7.56E-02 |
| TREM1     | triggering receptor expressed on myeloid cells 1           | 54210  | 2.71E-06 | 7.66E-02 |
| SLC1A3    | solute carrier family 1                                    | 6507   | 2.94E-06 | 8.32E-02 |
| LOC388796 | hypothetical LOC388796                                     | 388796 | 2.95E-06 | 8.32E-02 |
| NMB       | neuromedin B                                               | 4828   | 3.26E-06 | 9.17E-02 |
| LOC400027 | PREDICTED: hypothetical gene supported by BC047417         | 400027 | 3.37E-06 | 9.49E-02 |
| DFNA5     | deafness, autosomal dominant 5                             | 1687   | 3.47E-06 | 9.77E-02 |
| IGFBP1    | insulin-like growth factor binding protein 1               | 3484   | 3.49E-06 | 9.82E-02 |
