# Supplementary material for: Host mediated inflammatory influence on glioblastoma multiforme recurrence following high-dose ionizing radiation
Source: PubMed Central journal article supplement (PMC5439715; doi:10.1371/journal.pone.0178155), 2017-05-22
Supplement: pone.0178155.s003.pdf [file pone.0178155.s003.pdf]

**S3 Table. Functional gene classification using DAVID.** The top three enrichment groups found from the 273 identifiable genes with statistical significance.

| Group                                            | Enrichment Score*                            | Kappa**     | Gene name                                                 |
|--------------------------------------------------|----------------------------------------------|-------------|-----------------------------------------------------------|
| IL-1 Family                                      | 8.851                                        | <b>0.97</b> | <b>IL1F10: interleukin 1 family, member 10 (theta)</b>    |
|                                                  |                                              | <b>0.94</b> | <b>IL1F9: interleukin 1 family, member 9</b>              |
|                                                  |                                              | <b>0.89</b> | <b>IL1F5: interleukin 1 family, member 5 (delta)</b>      |
|                                                  |                                              | <b>0.71</b> | <b>IL1F8: interleukin 1 family, member 8 (eta)</b>        |
|                                                  |                                              | 0.57        | IL1RN; interleukin 1 receptor antagonist                  |
|                                                  |                                              | 0.46        | IL33: interleukin 33                                      |
| Chemokine Family<br>(C-C and C-X-C motif ligand) | 7.078                                        | <b>0.83</b> | <b>CXCL2: chemokine (C-X-C motif) ligand 2</b>            |
|                                                  |                                              | <b>0.82</b> | <b>CCL20: chemokine (C-C motif) ligand 20</b>             |
|                                                  |                                              | <b>0.81</b> | <b>CCL3L3/L1: chemokine (C-C motif) ligand 3-like 3/1</b> |
|                                                  |                                              | <b>0.80</b> | <b>CXCL5: chemokine (C-X-C motif) ligand 5</b>            |
|                                                  |                                              | <b>0.77</b> | <b>CXCL1: chemokine (C-X-C motif) ligand 1</b>            |
|                                                  |                                              | 0.59        | CCL3: chemokine (C-C motif) ligand 3                      |
|                                                  |                                              | 0.45        | IL8: interleukin 8                                        |
|                                                  |                                              | 0.41        | GDF15: growth differentiation factor 15                   |
|                                                  |                                              | 0.38        | CCL5: chemokine (C-C motif) ligand 5                      |
|                                                  |                                              | 0.35        | IL1RN: interleukin 1 receptor antagonist                  |
| Histone Family                                   | 3.172                                        | <b>0.93</b> | <b>HIST1H2BD: histone cluster 1, H2bd</b>                 |
|                                                  |                                              | <b>0.92</b> | <b>HIST2H2AA3/4: histone cluster 2, H2aa3; H2aa4</b>      |
|                                                  |                                              | <b>0.91</b> | <b>H2AFJ: H2A histone family, member J</b>                |
|                                                  |                                              | <b>0.90</b> | <b>HIST1H2AC: histone cluster 1, H2ac</b>                 |
|                                                  |                                              | <b>0.90</b> | <b>HIST2H2AC: histone cluster 2, H2ac</b>                 |
|                                                  |                                              | <b>0.88</b> | <b>HIST1H2BF: histone cluster 1, H2bi</b>                 |
|                                                  |                                              | <b>0.88</b> | <b>HIST2H2BE: histone cluster 2, H2be</b>                 |
|                                                  |                                              | 0.73        | HIST1H4J: histone cluster 1, H4I                          |
|                                                  |                                              | 0.73        | H1F0: H1 histone family, member 0                         |
| 0.51                                             | HJURP: Holliday junction recognition protein |             |                                                           |

\*Geometric mean of the overall group significance based on gene EASE scores (modified Fisher Exact P-Value) in -log scale.

\*\*Gene-to-gene Similarity Score: **Very high (0.75-1)**, High (0.5-0.75), Moderate (0.25-0.5), Low (<0.25)
